# Supplementary material for: Global gene expression analysis of systemic sclerosis myofibroblasts demonstrates a marked increase in the expression of multiple NBPF genes
Source: PubMed Central journal article supplement (PMC8516909; doi:10.1038/s41598-021-99292-y), 2021-10-14

## Supplementary File

Global gene expression analysis of Systemic Sclerosis myofibroblasts demonstrates a marked increase in the expression of multiple NBPF genes

**Authors:** Giuseppina Abignano<sup>#1,2</sup>, Heidi Hermes<sup>#3</sup>, Sonsoles Piera-Velazquez<sup>3</sup>, Sankar Addya<sup>4</sup>, Francesco Del Galdo<sup>^1,2\*</sup>, and Sergio A. Jimenez<sup>^3\*</sup>.

1. Leeds Institute of Rheumatic and Musculoskeletal Medicine, University of Leeds, United Kingdom.

2. NIHR Leeds Biomedical Research Centre, Leeds Teaching Hospitals NHS Trust, Leeds, United Kingdom.

3. Jefferson Institute of Molecular Medicine and Scleroderma Center, Thomas Jefferson University, USA.

4. Center for Genomics, Kimmel Cancer Center, Thomas Jefferson University, USA.

# These two authors contributed equally

^ These two authors contributed equally

\* These two authors are both corresponding authors.

\*Correspondence: f.delgaldo@leeds.ac.uk; sergio.jimenez@jefferson.edu

**Supplementary Figure S1.** Heat map showing gene expression levels of the eight samples [4  $\alpha$ -SMA negative (“A” samples) and 4  $\alpha$ -SMA positive (“B” samples) SSc fibroblasts] isolated from the same culture dish employing LCM. Gene expression levels are depicted as color variation from red (high expression) to blue (low expression). The gene expression microarrays were performed employing Affymetrix gene chips (human gene 1.0 ST arrays), and the analysis were performed utilizing the Agilent Gene Spring Software 11.5 also from Affymetrix.

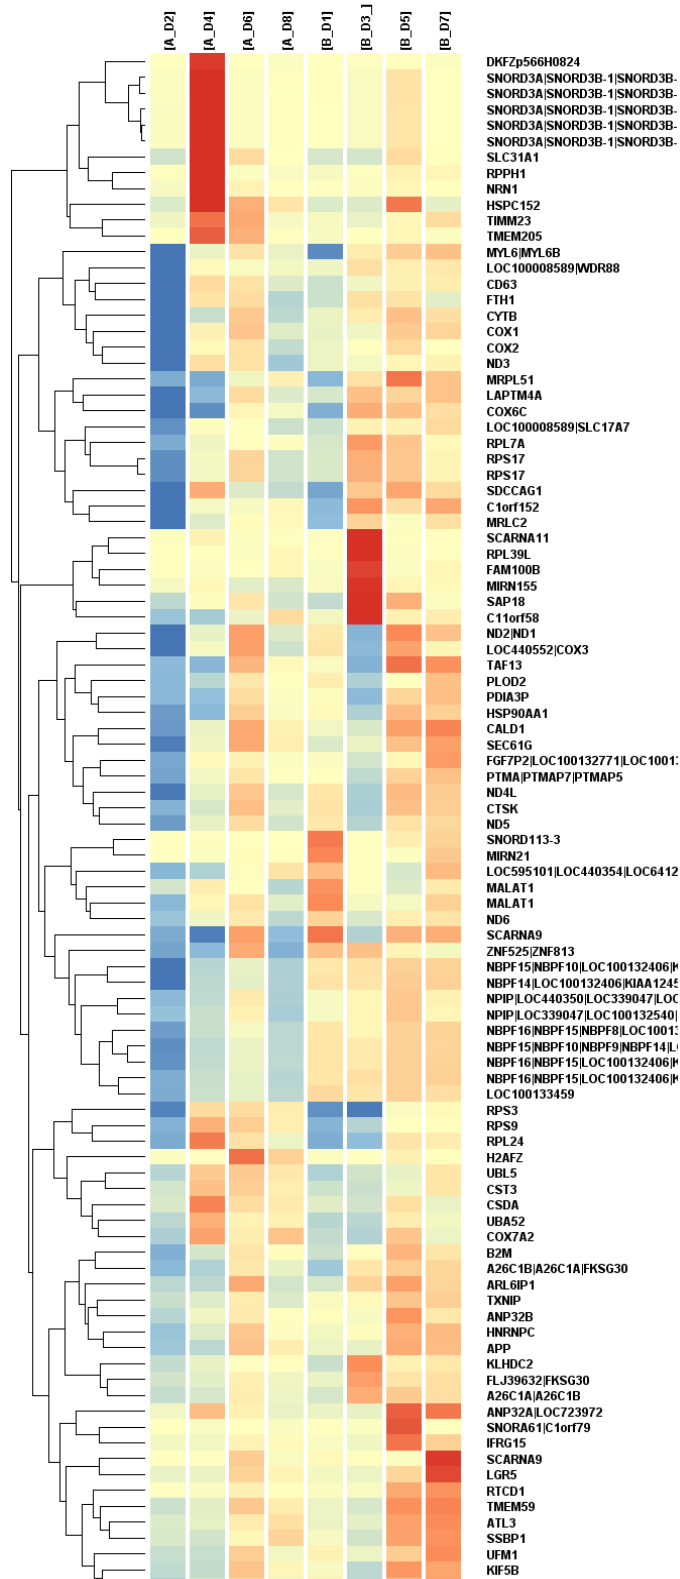

**Supplementary Figure S2.** Four heat maps showing gene expression level as separate images of each individual pair ( $\alpha$ -SMA-negative “A” vs.  $\alpha$ -SMA-positive “B” samples). The gene expression microarrays were performed employing Affymetrix gene chips (human gene 1.0 ST arrays), and the analysis were performed utilizing the Agilent Gene Spring Software 11.5 also from Affymetrix.

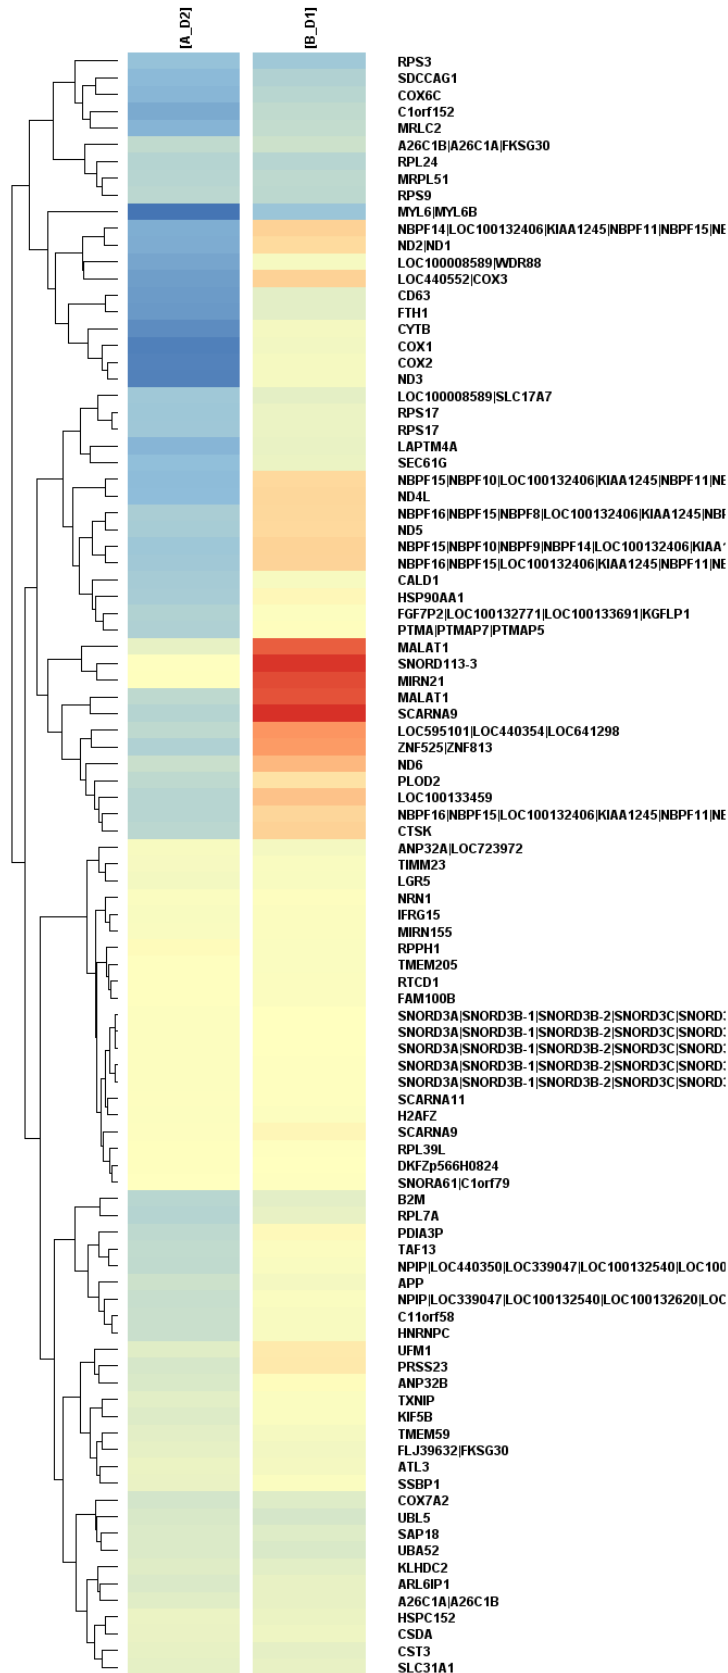

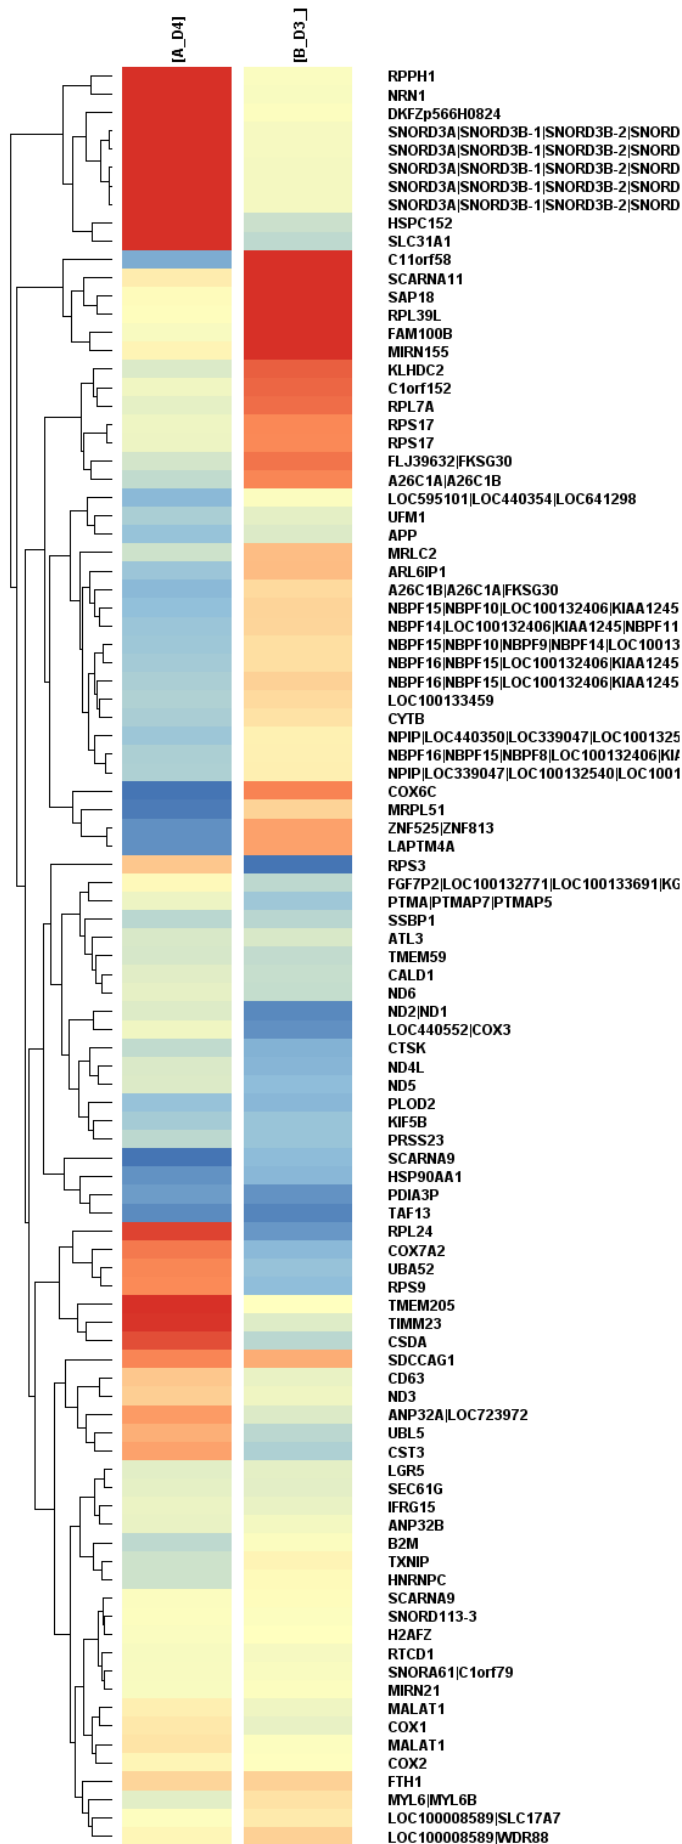

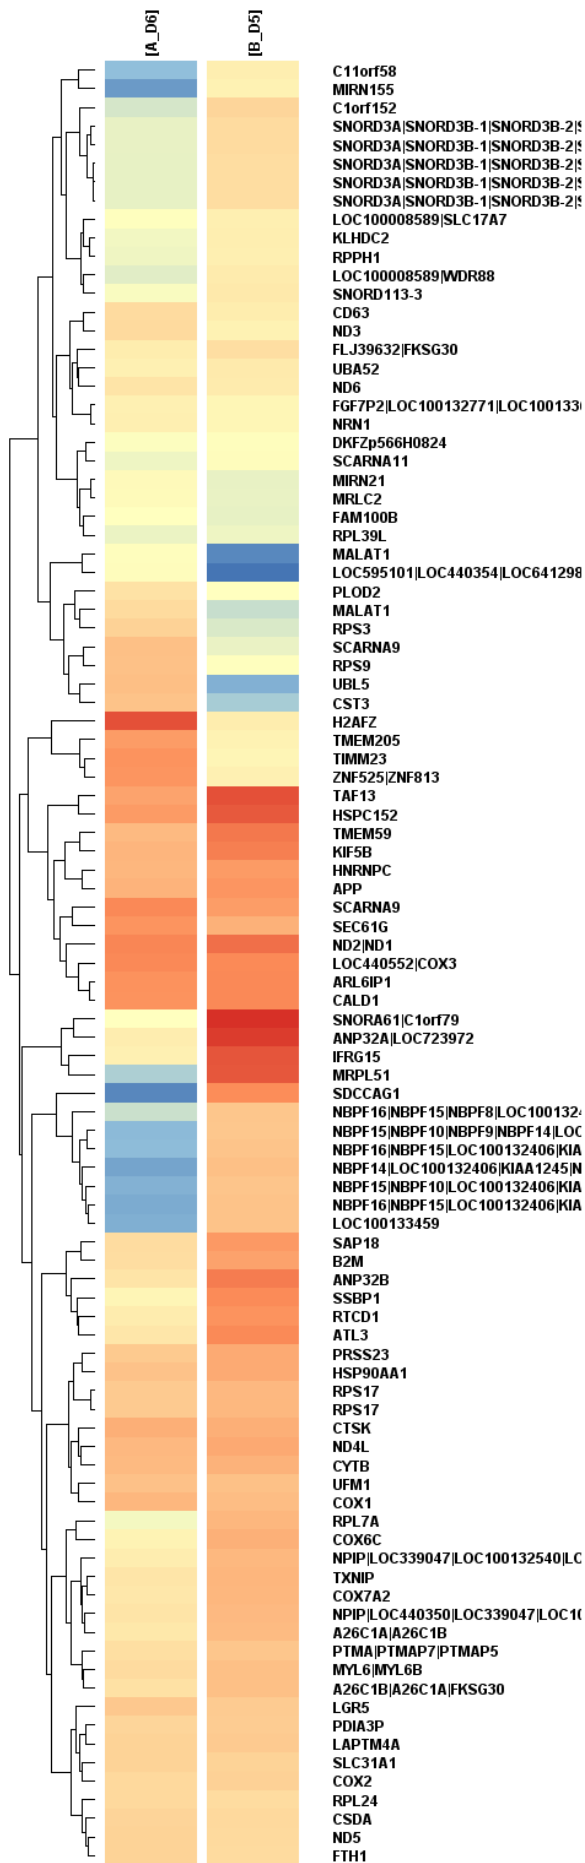

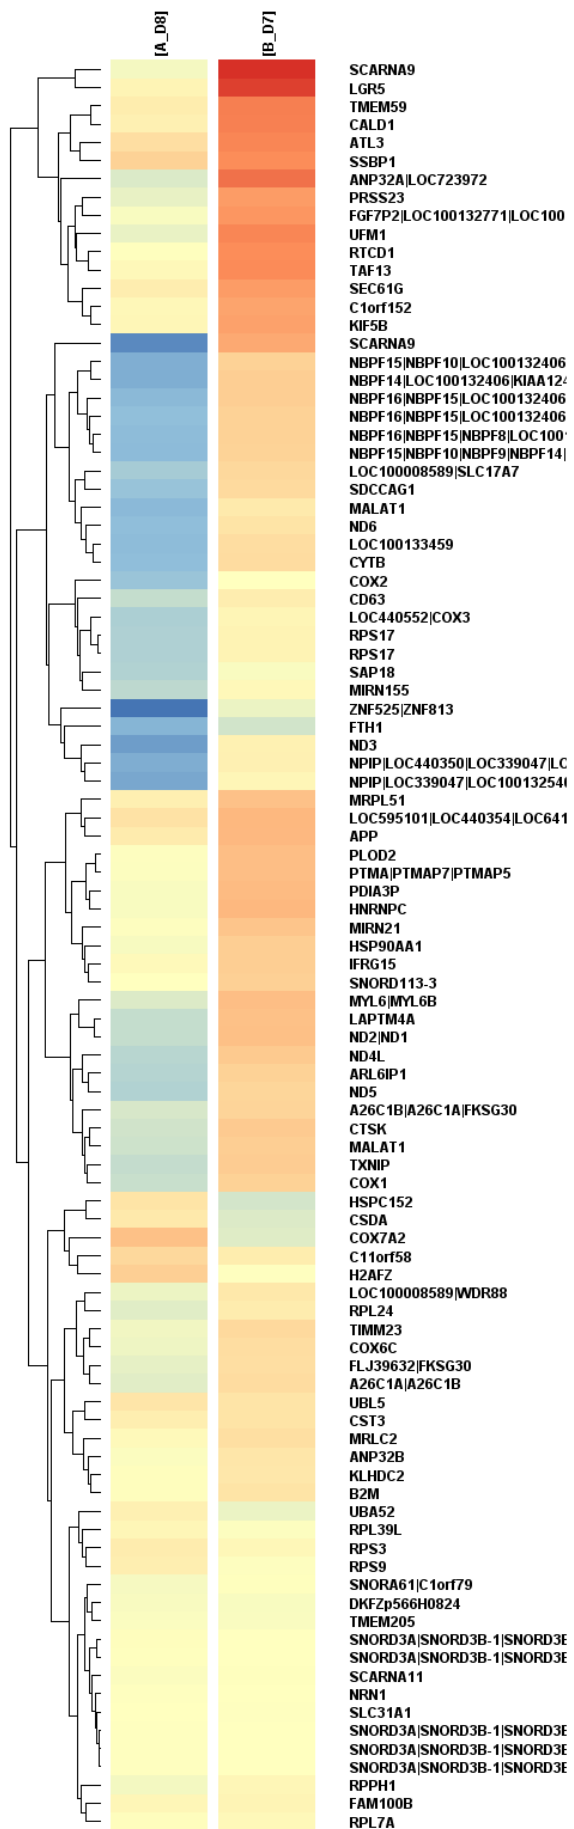



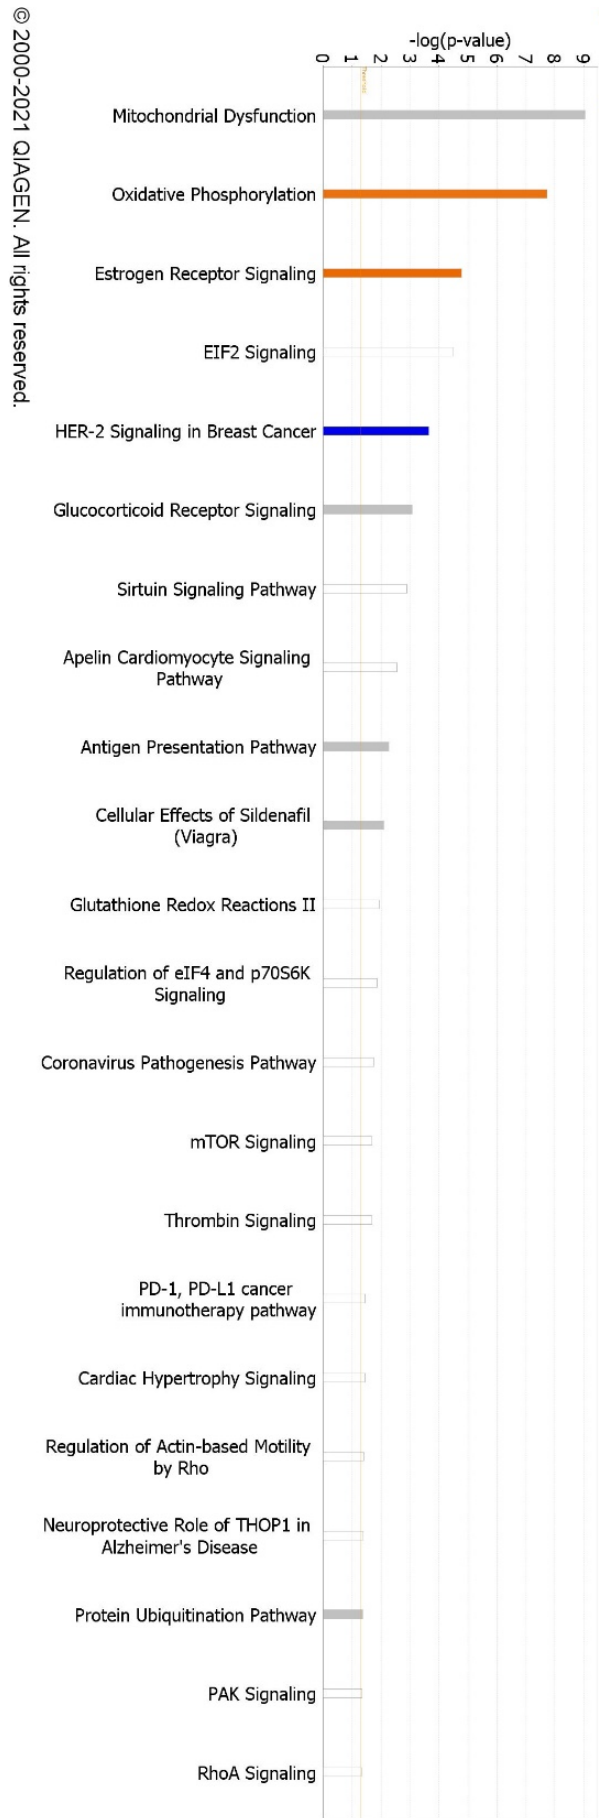



**Supplementary Table S1.** Complete list of the genes and pathways identified by Ingenuity CanPath.

© 2000-2013 Ingenuity Systems, Inc. All rights reserved.

|                                                                 |         |          |                                                 |
|-----------------------------------------------------------------|---------|----------|-------------------------------------------------|
| Regulation of Actin-based Motility by Rho                       | 6.06E00 | 9.3E-02  | MYL9,ACTR3,RND3,MYL6,ARPC2,ACTB,RHOA,ACTA2      |
| RhoA Signaling                                                  | 4.95E00 | 6.96E-02 | MYL9,ACTR3,RND3,MYL6,ARPC2,ACTB,RHOA,ACTA2      |
| RhoGDI Signaling                                                | 4.5E00  | 4.74E-02 | MYL9,ACTR3,RND3,MYL6,ARPC2,ACTB,RHOA,ACTA2,GNG5 |
| Epithelial Adherens Junction Signaling                          | 4.24E00 | 5.56E-02 | MYL9,ACTR3,LMO7,MYL6,ARPC2,ACTB,RHOA,ACTA2      |
| Signaling by Rho Family GTPases                                 | 3.57E00 | 3.63E-02 | MYL9,ACTR3,RND3,MYL6,ARPC2,ACTB,RHOA,ACTA2,GNG5 |
| Integrin Signaling                                              | 3.35E00 | 3.9E-02  | MYL9,ACTR3,RND3,ITGA11,ARPC2,ACTB,RHOA,ACTA2    |
| Tight Junction Signaling                                        | 3.28E00 | 4.46E-02 | MYL9,MYL6,RAB13,ACTB,RHOA,ACTA2,PRKAR1A         |
| NRF2-mediated Oxidative Stress Response                         | 2.89E00 | 3.74E-02 | SOD1,MGST2,ACTB,ACTA2,UBE2K,DNAJA2,TXN          |
| Actin Nucleation by ARP-WASP Complex                            | 2.75E00 | 6.06E-02 | ACTR3,RND3,ARPC2,RHOA                           |
| Mitochondrial Dysfunction                                       | 2.55E00 | 3.95E-02 | NDUFA4,FIS1,MT-ND6,UQCRH,MT-CYB,COX6C           |
| Remodeling of Epithelial Adherens Junctions                     | 2.49E00 | 6.06E-02 | ACTR3,ARPC2,ACTB,ACTA2                          |
| Actin Cytoskeleton Signaling                                    | 2.47E00 | 3.04E-02 | MYL9,ACTR3,MYL6,ARPC2,ACTB,RHOA,ACTA2           |
| Caveolar-mediated Endocytosis Signaling                         | 2.35E00 | 4.94E-02 | CD55,ITGA11,ACTB,ACTA2                          |
| Cellular Effects of Sildenafil (Viagra)                         | 2.23E00 | 3.97E-02 | MYL9,MYL6,ACTB,ACTA2,PRKAR1A                    |
| ILK Signaling                                                   | 2.17E00 | 3.24E-02 | MYL9,RND3,MYL6,ACTB,RHOA,ACTA2                  |
| Cdc42 Signaling                                                 | 2.16E00 | 3.5E-02  | MYL9,ACTR3,MYL6,ARPC2,EXOC5                     |
| IL-8 Signaling                                                  | 2.15E00 | 3.12E-02 | RAB11FIP2,MYL9,ANGPT1,RND3,RHOA,GNG5            |
| Leukocyte Extravasation Signaling                               | 2.04E00 | 3.06E-02 | EDIL3,MYL6,ACTB,RHOA,ACTA2,TIMP2                |
| Granzyme A Signaling                                            | 1.98E00 | 1.18E-01 | SET,ANP32A                                      |
| Fcy Receptor-mediated Phagocytosis in Macrophages and Monocytes | 1.96E00 | 4.21E-02 | ACTR3,ARPC2,ACTB,ACTA2                          |
| Assembly of RNA Polymerase II Complex                           | 1.96E00 | 5.45E-02 | POLR2F,POLR2H,TAF13                             |
| CXCR4 Signaling                                                 | 1.88E00 | 3.12E-02 | MYL9,RND3,MYL6,RHOA,GNG5                        |
| Tec Kinase Signaling                                            | 1.85E00 | 2.86E-02 | RND3,ACTB,RHOA,ACTA2,GNG5                       |
| Glioma Invasiveness Signaling                                   | 1.8E00  | 5.08E-02 | RND3,RHOA,TIMP2                                 |
| Cardiac Hypertrophy Signaling                                   | 1.79E00 | 2.62E-02 | MYL9,RND3,MYL6,RHOA,GNG5,PRKAR1A                |
| Choline Degradation I                                           | 1.73E00 | 5E-01    | ALDH7A1                                         |
| Androgen Signaling                                              | 1.72E00 | 3.05E-02 | POLR2F,POLR2H,GNG5,PRKAR1A                      |
| Calcium Signaling                                               | 1.68E00 | 2.66E-02 | MYL9,MYL6,ACTA2,TPM2,PRKAR1A                    |
| Ephrin Receptor Signaling                                       | 1.66E00 | 2.54E-02 | ACTR3,ANGPT1,ARPC2,RHOA,GNG5                    |
| Estrogen Receptor Signaling                                     | 1.53E00 | 3.01E-02 | POLR2F,H3F3A/H3F3B,POLR2H,TAF13                 |
| Thrombin Signaling                                              | 1.52E00 | 2.54E-02 | MYL9,RND3,MYL6,RHOA,GNG5                        |
| Aryl Hydrocarbon Receptor Signaling                             | 1.46E00 | 2.84E-02 | HSP90B1,MGST2,NEDD8,ALDH7A1                     |
| Myo-inositol Biosynthesis                                       | 1.44E00 | 2.5E-01  | IMPAD1                                          |

|                                                      |          |          |                                               |
|------------------------------------------------------|----------|----------|-----------------------------------------------|
| Hepatic Fibrosis / Hepatic Stellate Cell Activation  | 1.42E00  | 2.86E-02 | MYL9,MYL6,ACTA2,TIMP2                         |
| Nucleotide Excision Repair Pathway                   | 1.38E00  | 5.71E-02 | POLR2F,POLR2H                                 |
| Axonal Guidance Signaling                            | 1.37E00  | 1.75E-02 | MYL9,PAPPA,ACTR3,MYL6,ARPC2,RHOA,GNG5,PRKAR1A |
| Lysine Degradation II                                | 1.34E00  | 2E-01    | ALDH7A1                                       |
| Lysine Degradation V                                 | 1.34E00  | 2E-01    | ALDH7A1                                       |
| Virus Entry via Endocytic Pathways                   | 1.31E00  | 3.26E-02 | CD55,ACTB,ACTA2                               |
| VEGF Signaling                                       | 1.31E00  | 3.16E-02 | EIF1AX,ACTB,ACTA2                             |
| Mechanisms of Viral Exit from Host Cells             | 1.28E00  | 5E-02    | ACTB,ACTA2                                    |
| Thioredoxin Pathway                                  | 1.27E00  | 1.67E-01 | TXN                                           |
| Superoxide Radicals Degradation                      | 1.27E00  | 1.67E-01 | SOD1                                          |
| Germ Cell-Sertoli Cell Junction Signaling            | 1.26E00  | 2.55E-02 | RND3,ACTB,RHOA,ACTA2                          |
| Phospholipase C Signaling                            | 1.22E00  | 2.05E-02 | MYL9,RND3,MYL6,RHOA,GNG5                      |
| Paxillin Signaling                                   | 1.19E00  | 2.73E-02 | ITGA11,ACTB,ACTA2                             |
| MSP-RON Signaling Pathway                            | 1.19E00  | 4.26E-02 | ACTB,ACTA2                                    |
| Rac Signaling                                        | 1.15E00  | 2.56E-02 | ACTR3,ARPC2,RHOA                              |
| CREB Signaling in Neurons                            | 1.14E00  | 2.16E-02 | POLR2F,POLR2H,GNG5,PRKAR1A                    |
| fMLP Signaling in Neutrophils                        | 1.11E00  | 2.52E-02 | ACTR3,ARPC2,GNG5                              |
| Agranulocyte Adhesion and Diapedesis                 | 1.11E00  | 2.27E-02 | MYL9,MYL6,ACTB,ACTA2                          |
| Semaphorin Signaling in Neurons                      | 1.08E00  | 3.85E-02 | RND3,RHOA                                     |
| mTOR Signaling                                       | 1.05E00  | 2.12E-02 | RND3,RHOA,RPS8,EIF4B                          |
| Clathrin-mediated Endocytosis Signaling              | 1.05E00  | 2.09E-02 | ACTR3,ARPC2,ACTB,ACTA2                        |
| Gα12/13 Signaling                                    | 1.02E00  | 2.44E-02 | MYL9,MYL6,RHOA                                |
| Glutamate Receptor Signaling                         | 1.02E00  | 3.28E-02 | SLC17A7,GNG5                                  |
| Histamine Degradation                                | 9.76E-01 | 8.33E-02 | ALDH7A1                                       |
| Fatty Acid α-oxidation                               | 9.44E-01 | 7.69E-02 | ALDH7A1                                       |
| Hypoxia Signaling in the Cardiovascular System       | 9.38E-01 | 3.12E-02 | HSP90B1,UBE2L3                                |
| Leukotriene Biosynthesis                             | 9.13E-01 | 7.14E-02 | MGST2                                         |
| Vitamin-C Transport                                  | 9.13E-01 | 7.14E-02 | TXN                                           |
| Protein Kinase A Signaling                           | 9.06E-01 | 1.61E-02 | MYL9,H3F3A/H3F3B,MYL6,RHOA,GNG5,PRKAR1A       |
| Agrin Interactions at Neuromuscular Junction         | 8.94E-01 | 2.99E-02 | ACTB,ACTA2                                    |
| The Visual Cycle                                     | 8.85E-01 | 6.25E-02 | RDH10                                         |
| Oxidative Ethanol Degradation III                    | 8.85E-01 | 3.7E-02  | ALDH7A1                                       |
| Tryptophan Degradation X (Mammalian, via Tryptamine) | 8.59E-01 | 6.25E-02 | ALDH7A1                                       |
| Putrescine Degradation III                           | 8.59E-01 | 6.25E-02 | ALDH7A1                                       |
| Glutathione Redox Reactions I                        | 8.35E-01 | 5.88E-02 | MGST2                                         |
| Ethanol Degradation IV                               | 8.35E-01 | 5.88E-02 | ALDH7A1                                       |
| Ephrin B Signaling                                   | 8.34E-01 | 2.53E-02 | RHOA,GNG5                                     |
| BMP signaling pathway                                | 8.25E-01 | 2.56E-02 | FST,PRKAR1A                                   |

|                                                                |          |          |                             |
|----------------------------------------------------------------|----------|----------|-----------------------------|
| Glioblastoma Multiforme Signaling                              | 8.21E-01 | 1.91E-02 | IGF2,RND3,RHOA              |
| Gαq Signaling                                                  | 8.21E-01 | 1.91E-02 | RND3,RHOA,GNG5              |
| D-myo-inositol (1,4,5)-triphosphate Degradation                | 8.12E-01 | 5.56E-02 | IMPAD1                      |
| Gap Junction Signaling                                         | 7.84E-01 | 1.92E-02 | ACTB,ACTA2,PRKAR1A          |
| Colorectal Cancer Metastasis Signaling                         | 7.74E-01 | 1.64E-02 | RND3,RHOA,GNG5,PRKAR1A      |
| Prostate Cancer Signaling                                      | 7.72E-01 | 2.2E-02  | HSP90B1,PA2G4               |
| DNA Methylation and Transcriptional Repression Signaling       | 7.7E-01  | 4.35E-02 | SAP18                       |
| Dopamine Degradation                                           | 7.51E-01 | 4.76E-02 | ALDH7A1                     |
| α-Adrenergic Signaling                                         | 7.31E-01 | 2.17E-02 | GNG5,PRKAR1A                |
| Bladder Cancer Signaling                                       | 7.23E-01 | 2.25E-02 | PA2G4,THBS1                 |
| FAK Signaling                                                  | 7.23E-01 | 2.04E-02 | ACTB,ACTA2                  |
| Glutathione-mediated Detoxification                            | 7.15E-01 | 4.35E-02 | MGST2                       |
| G Beta Gamma Signaling                                         | 7.08E-01 | 2E-02    | GNG5,PRKAR1A                |
| PAK Signaling                                                  | 7.08E-01 | 1.92E-02 | MYL9,MYL6                   |
| Crosstalk between Dendritic Cells and Natural Killer Cells     | 7.01E-01 | 2.2E-02  | ACTB,ACTA2                  |
| Superpathway of D-myo-inositol (1,4,5)-triphosphate Metabolism | 6.99E-01 | 4.17E-02 | IMPAD1                      |
| IL-1 Signaling                                                 | 6.86E-01 | 1.96E-02 | GNG5,PRKAR1A                |
| Protein Ubiquitination Pathway                                 | 6.8E-01  | 1.52E-02 | USO1,HSP90B1,UBE2L3,USP53   |
| HMGB1 Signaling                                                | 6.72E-01 | 2.06E-02 | RND3,RHOA                   |
| EIF2 Signaling                                                 | 6.71E-01 | 1.66E-02 | EIF1AX,RPS8,RPL12           |
| Sertoli Cell-Sertoli Cell Junction Signaling                   | 6.66E-01 | 1.64E-02 | ACTB,ACTA2,PRKAR1A          |
| Glioma Signaling                                               | 6.65E-01 | 1.89E-02 | IGF2,PA2G4                  |
| Glucocorticoid Receptor Signaling                              | 6.64E-01 | 1.44E-02 | HSP90B1,POLR2F,POLR2H,TAF13 |
| Nitric Oxide Signaling in the Cardiovascular System            | 6.59E-01 | 1.96E-02 | HSP90B1,PRKAR1A             |
| Retinoate Biosynthesis I                                       | 6.26E-01 | 3.33E-02 | RDH10                       |
| Sonic Hedgehog Signaling                                       | 6.26E-01 | 3.23E-02 | PRKAR1A                     |
| Cholecystokinin/Gastrin-mediated Signaling                     | 6.2E-01  | 1.98E-02 | RND3,RHOA                   |
| Ethanol Degradation II                                         | 6.13E-01 | 3.33E-02 | ALDH7A1                     |
| G Protein Signaling Mediated by Tubby                          | 6.01E-01 | 2.7E-02  | GNG5                        |
| Breast Cancer Regulation by Stathmin1                          | 5.89E-01 | 1.52E-02 | RHOA,GNG5,PRKAR1A           |
| Inhibition of Angiogenesis by TSP1                             | 5.89E-01 | 3.12E-02 | THBS1                       |
| Noradrenaline and Adrenaline Degradation                       | 5.89E-01 | 3.12E-02 | ALDH7A1                     |
| Complement System                                              | 5.89E-01 | 3.03E-02 | CD55                        |
| Sphingosine-1-phosphate Signaling                              | 5.79E-01 | 1.74E-02 | RND3,RHOA                   |
| Gas Signaling                                                  | 5.79E-01 | 1.74E-02 | GNG5,PRKAR1A                |
| Retinol Biosynthesis                                           | 5.78E-01 | 2.94E-02 | RDH10                       |
| Hereditary Breast Cancer                                       | 5.57E-01 | 1.68E-02 | POLR2F,POLR2H               |

|                                                            |          |          |                         |
|------------------------------------------------------------|----------|----------|-------------------------|
| Signaling                                                  |          |          |                         |
| CCR3 Signaling in Eosinophils                              | 5.51E-01 | 1.65E-02 | RHOA,GNG5               |
| CD28 Signaling in T Helper Cells                           | 5.51E-01 | 1.64E-02 | ACTR3,ARPC2             |
| Inhibition of Matrix Metalloproteases                      | 5.26E-01 | 2.63E-02 | TIMP2                   |
| P2Y Purigenic Receptor Signaling Pathway                   | 5.26E-01 | 1.6E-02  | GNG5,PRKAR1A            |
| Netrin Signaling                                           | 5.17E-01 | 2.22E-02 | PRKAR1A                 |
| Gai Signaling                                              | 5.16E-01 | 1.56E-02 | GNG5,PRKAR1A            |
| Neuroprotective Role of THOP1 in Alzheimer's Disease       | 5.08E-01 | 2.38E-02 | PRKAR1A                 |
| Transcriptional Regulatory Network in Embryonic Stem Cells | 5.08E-01 | 2.5E-02  | SET                     |
| eNOS Signaling                                             | 4.97E-01 | 1.55E-02 | HSP90B1,PRKAR1A         |
| Huntington's Disease Signaling                             | 4.94E-01 | 1.31E-02 | POLR2F,POLR2H,GNG5      |
| Role of Oct4 in Mammalian Embryonic Stem Cell Pluripotency | 4.74E-01 | 2.27E-02 | PHB                     |
| Ovarian Cancer Signaling                                   | 4.66E-01 | 1.45E-02 | PA2G4,PRKAR1A           |
| Relaxin Signaling                                          | 4.61E-01 | 1.38E-02 | GNG5,PRKAR1A            |
| Cardiac $\beta$ -adrenergic Signaling                      | 4.61E-01 | 1.43E-02 | GNG5,PRKAR1A            |
| Ephrin A Signaling                                         | 4.43E-01 | 2E-02    | RHOA                    |
| Amyloid Processing                                         | 4.29E-01 | 1.92E-02 | PRKAR1A                 |
| Molecular Mechanisms of Cancer                             | 4.26E-01 | 1.1E-02  | RND3,PA2G4,RHOA,PRKAR1A |
| Phototransduction Pathway                                  | 4.23E-01 | 1.85E-02 | PRKAR1A                 |
| Regulation of eIF4 and p70S6K Signaling                    | 4.21E-01 | 1.27E-02 | EIF1AX,RPS8             |
| Serotonin Degradation                                      | 4.16E-01 | 1.92E-02 | ALDH7A1                 |
| UVB-Induced MAPK Signaling                                 | 4.16E-01 | 1.85E-02 | H3F3A/H3F3B             |
| Cell Cycle: G1/S Checkpoint Regulation                     | 3.74E-01 | 1.56E-02 | PA2G4                   |
| Antiproliferative Role of Somatostatin Receptor 2          | 3.69E-01 | 1.56E-02 | GNG5                    |
| Xenobiotic Metabolism Signaling                            | 3.63E-01 | 1.12E-02 | HSP90B1,MGST2,ALDH7A1   |
| Mitotic Roles of Polo-Like Kinase                          | 3.58E-01 | 1.56E-02 | HSP90B1                 |
| PXR/RXR Activation                                         | 3.53E-01 | 1.56E-02 | PRKAR1A                 |
| PPAR $\alpha$ /RXR $\alpha$ Activation                     | 3.47E-01 | 1.16E-02 | HSP90B1,PRKAR1A         |
| Angiopoietin Signaling                                     | 3.43E-01 | 1.41E-02 | ANGPT1                  |
| Non-Small Cell Lung Cancer Signaling                       | 3.43E-01 | 1.37E-02 | PA2G4                   |
| CCR5 Signaling in Macrophages                              | 3.33E-01 | 1.23E-02 | GNG5                    |
| Melatonin Signaling                                        | 3.33E-01 | 1.47E-02 | PRKAR1A                 |
| RAR Activation                                             | 3.33E-01 | 1.14E-02 | RDH10,PRKAR1A           |
| Growth Hormone Signaling                                   | 3.29E-01 | 1.41E-02 | IGF2                    |
| Chemokine Signaling                                        | 3.29E-01 | 1.47E-02 | RHOA                    |
| Macropinocytosis Signaling                                 | 3.29E-01 | 1.32E-02 | RHOA                    |

|                                                                       |          |          |                     |
|-----------------------------------------------------------------------|----------|----------|---------------------|
| Small Cell Lung Cancer Signaling                                      | 3.15E-01 | 1.19E-02 | PA2G4               |
| PEDF Signaling                                                        | 3.15E-01 | 1.3E-02  | RHOA                |
| Role of NFAT in Cardiac Hypertrophy                                   | 3.13E-01 | 1.07E-02 | GNG5,PRKAR1A        |
| Leptin Signaling in Obesity                                           | 3.07E-01 | 1.32E-02 | PRKAR1A             |
| Production of Nitric Oxide and Reactive Oxygen Species in Macrophages | 3.05E-01 | 1.08E-02 | RND3,RHOA           |
| Dopamine Receptor Signaling                                           | 2.99E-01 | 1.32E-02 | PRKAR1A             |
| Cyclins and Cell Cycle Regulation                                     | 2.91E-01 | 1.15E-02 | PA2G4               |
| ERK/MAPK Signaling                                                    | 2.9E-01  | 1.01E-02 | H3F3A/H3F3B,PRKAR1A |
| Melanocyte Development and Pigmentation Signaling                     | 2.65E-01 | 1.15E-02 | PRKAR1A             |
| Neuregulin Signaling                                                  | 2.59E-01 | 1.05E-02 | HSP90B1             |
| CDK5 Signaling                                                        | 2.55E-01 | 1.12E-02 | PRKAR1A             |
| PPAR Signaling                                                        | 2.46E-01 | 1E-02    | HSP90B1             |
| Chronic Myeloid Leukemia Signaling                                    | 2.4E-01  | 9.8E-03  | PA2G4               |
| Systemic Lupus Erythematosus Signaling                                | 2.38E-01 | 8.66E-03 | ZCRB1,HNRNPC        |
| p53 Signaling                                                         | 2.37E-01 | 1.05E-02 | THBS1               |
| SAPK/JNK Signaling                                                    | 2.37E-01 | 1E-02    | GNG5                |
| LPS/IL-1 Mediated Inhibition of RXR Function                          | 2.36E-01 | 9.01E-03 | MGST2,ALDH7A1       |
| Antioxidant Action of Vitamin C                                       | 2.34E-01 | 1.02E-02 | TXN                 |
| Telomerase Signaling                                                  | 2.28E-01 | 1.01E-02 | HSP90B1             |
| Amyotrophic Lateral Sclerosis Signaling                               | 2.25E-01 | 1E-02    | SOD1                |
| IGF-1 Signaling                                                       | 2.25E-01 | 9.8E-03  | PRKAR1A             |
| Neuropathic Pain Signaling In Dorsal Horn Neurons                     | 2.2E-01  | 9.8E-03  | PRKAR1A             |
| Pancreatic Adenocarcinoma Signaling                                   | 2.02E-01 | 8.7E-03  | PA2G4               |
| NGF Signaling                                                         | 2.02E-01 | 9.01E-03 | RHOA                |
| Corticotropin Releasing Hormone Signaling                             | 2E-01    | 8.77E-03 | PRKAR1A             |
| Renin-Angiotensin Signaling                                           | 1.97E-01 | 8.85E-03 | PRKAR1A             |

**Supplementary Figure S4.** List of the RNA samples used in the microarray experiments with their concentrations, the 260/280 ratio for demonstration of their high purity and the nanodrop analysis.

| SSc Patient | SMA | Nanodrop ID | ng/microl | 260/280 |
|-------------|-----|-------------|-----------|---------|
| 1           | +   | 1           | 425.8     | 1.85    |
| 1           | -   | 2           | 453       | 1.81    |
| 2           | +   | 3           | 188.9     | 1.95    |
| 2           | -   | 4           | 150       | 1.94    |
| 3           | +   | 5           | 218.1     | 1.94    |
| 3           | -   | 6           | 202.7     | 1.93    |
| 4           | +   | 7           | 150.6     | 1.92    |
| 4           | -   | 8           | 186.9     | 1.89    |

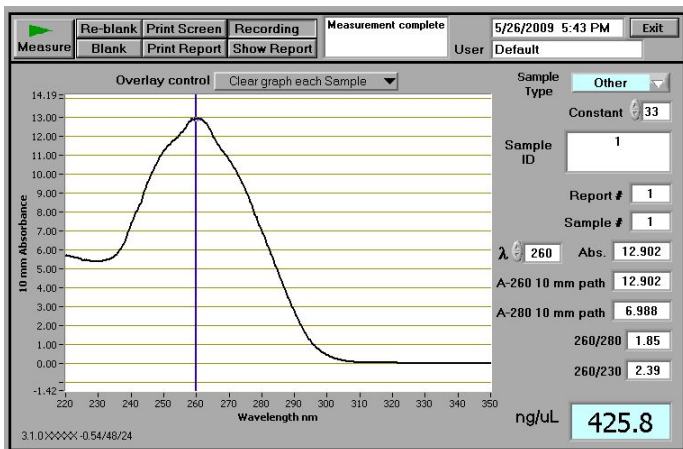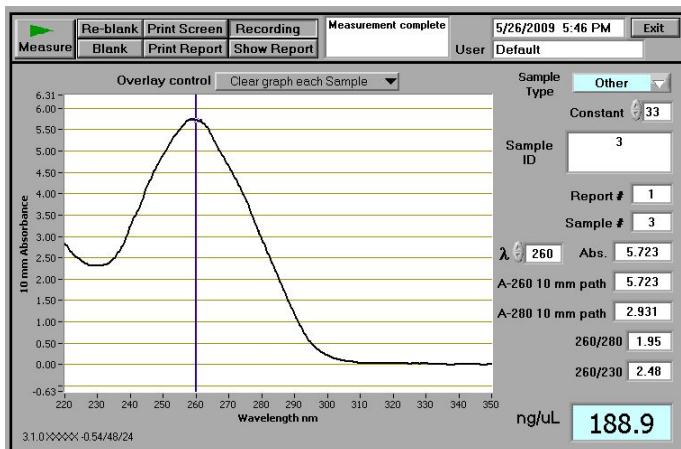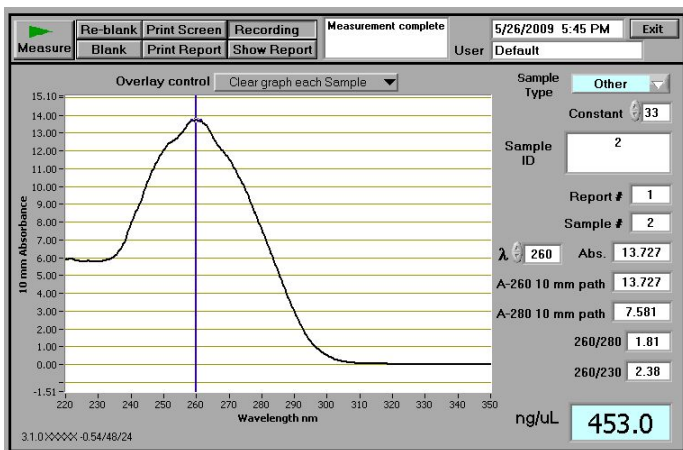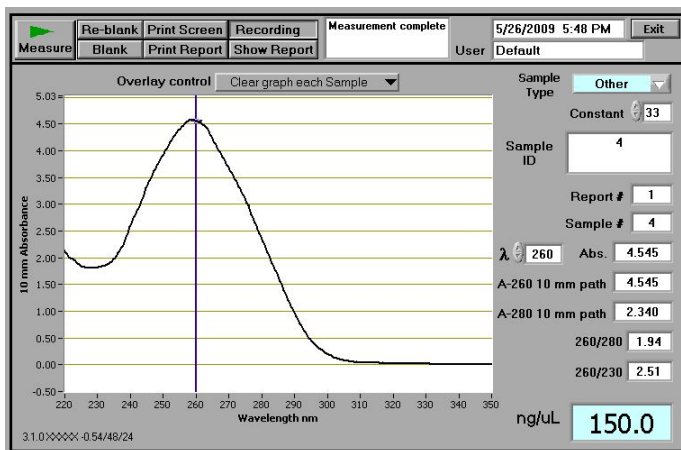

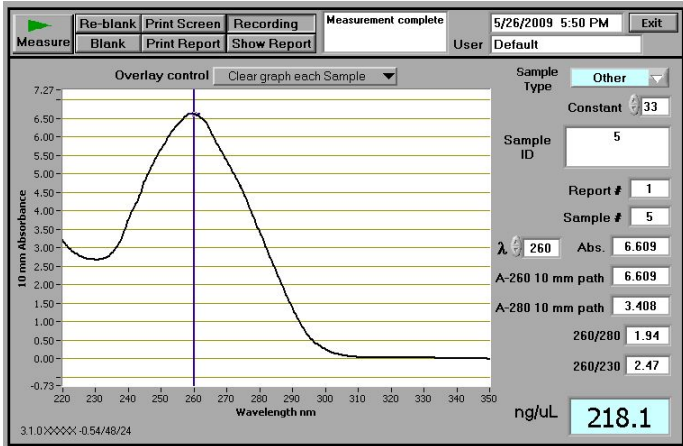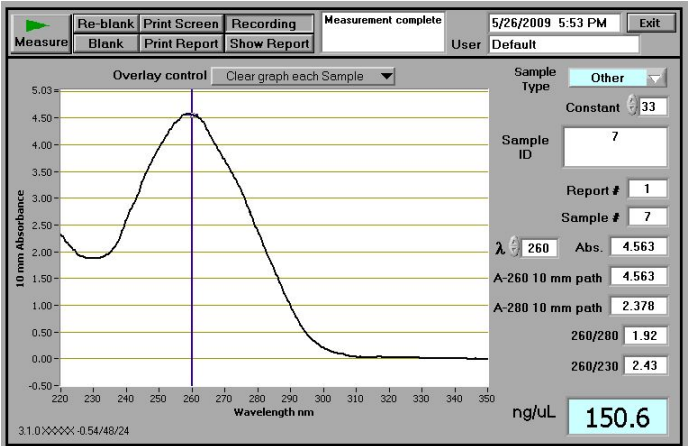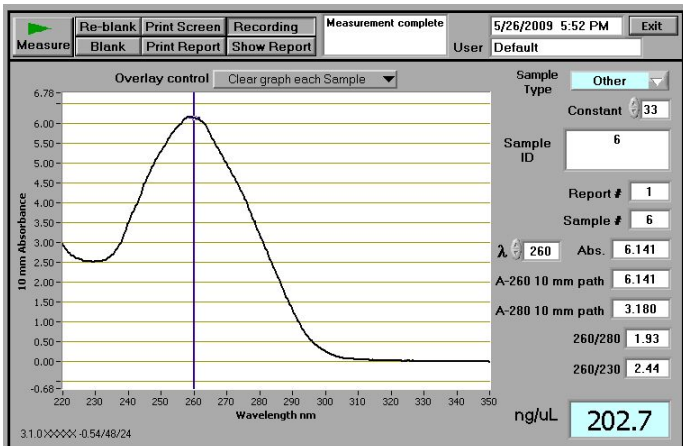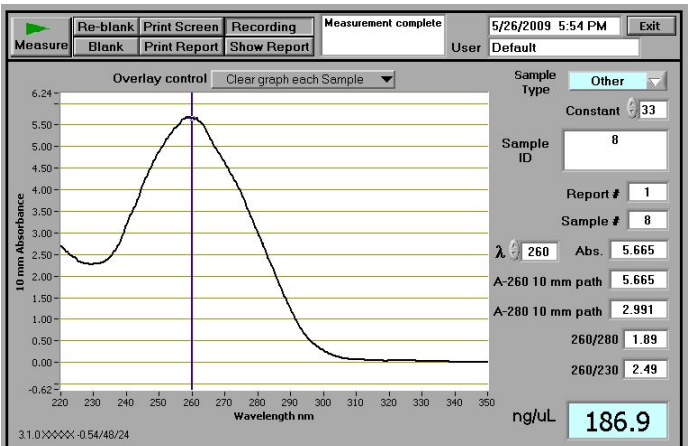

**Supplementary Figure S5.** Full blots of Western Blot included in Figure 3.

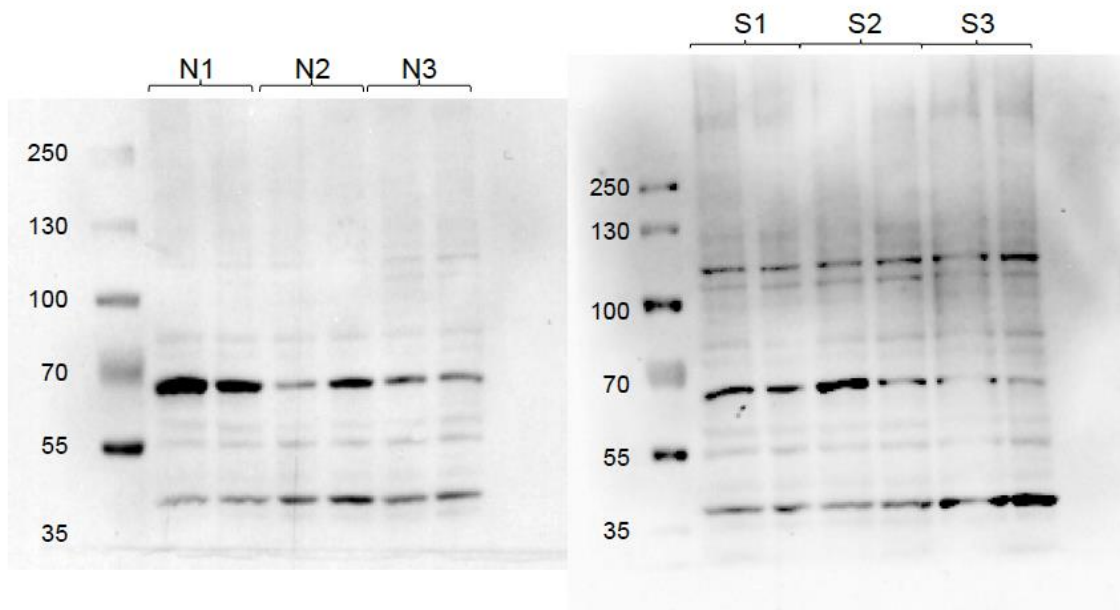

Supplement: 41598_2021_99292_MOESM2_ESM.pdf [file 41598_2021_99292_MOESM2_ESM.pdf]
